# Supplementary material for: Efficacy, Safety, and Usability of Remifentanil as Premedication for INSURE in Preterm Neonates
Source: Children (Basel). 2018 May 22;5(5):63. doi: 10.3390/children5050063 (PMC5977045; doi:10.3390/children5050063)
Supplement: Supplementary file 1 [file children-05-00063-s001.zip › children-302284 suplementary 2.pdf]

# Supplemental information, online only

1. Table S1. Survey respondents' professional roles
2. Figure S1. Distribution of attempts per intubation
3. Figure S2. Intubator role for first and final intubation attempts
4. Figure S3. Perceived adverse effects and/or logistical problems with remifentanil administration amongst various respondent roles
5. Figure S4. Observed adverse events, according to survey respondents
6. Figure S5. Perceived satisfaction with remifentanil premedication amongst various respondent roles
7. Figure S6. Perceived effectiveness of remifentanil premedication amongst various respondent roles

**Table S1.** Survey respondents’ professional roles

| Respondents’ professional role                     | Count | %      |
|----------------------------------------------------|-------|--------|
| Resident                                           | 22    | 14.3%  |
| Nurse practitioner / physician's assistant (NP/PA) | 14    | 9.1%   |
| NP/PA student                                      | 1     | 0.7%   |
| Fellow                                             | 3     | 2.0%   |
| Attending                                          | 12    | 7.8%   |
| Registered nurse (RN)                              | 82    | 53.3%  |
| Respiratory therapist                              | 12    | 7.8%   |
| Pharmacist                                         | 8     | 5.2%   |
| Total                                              | 154   | 100.0% |

**Figure S1.** Distribution of attempts per intubation

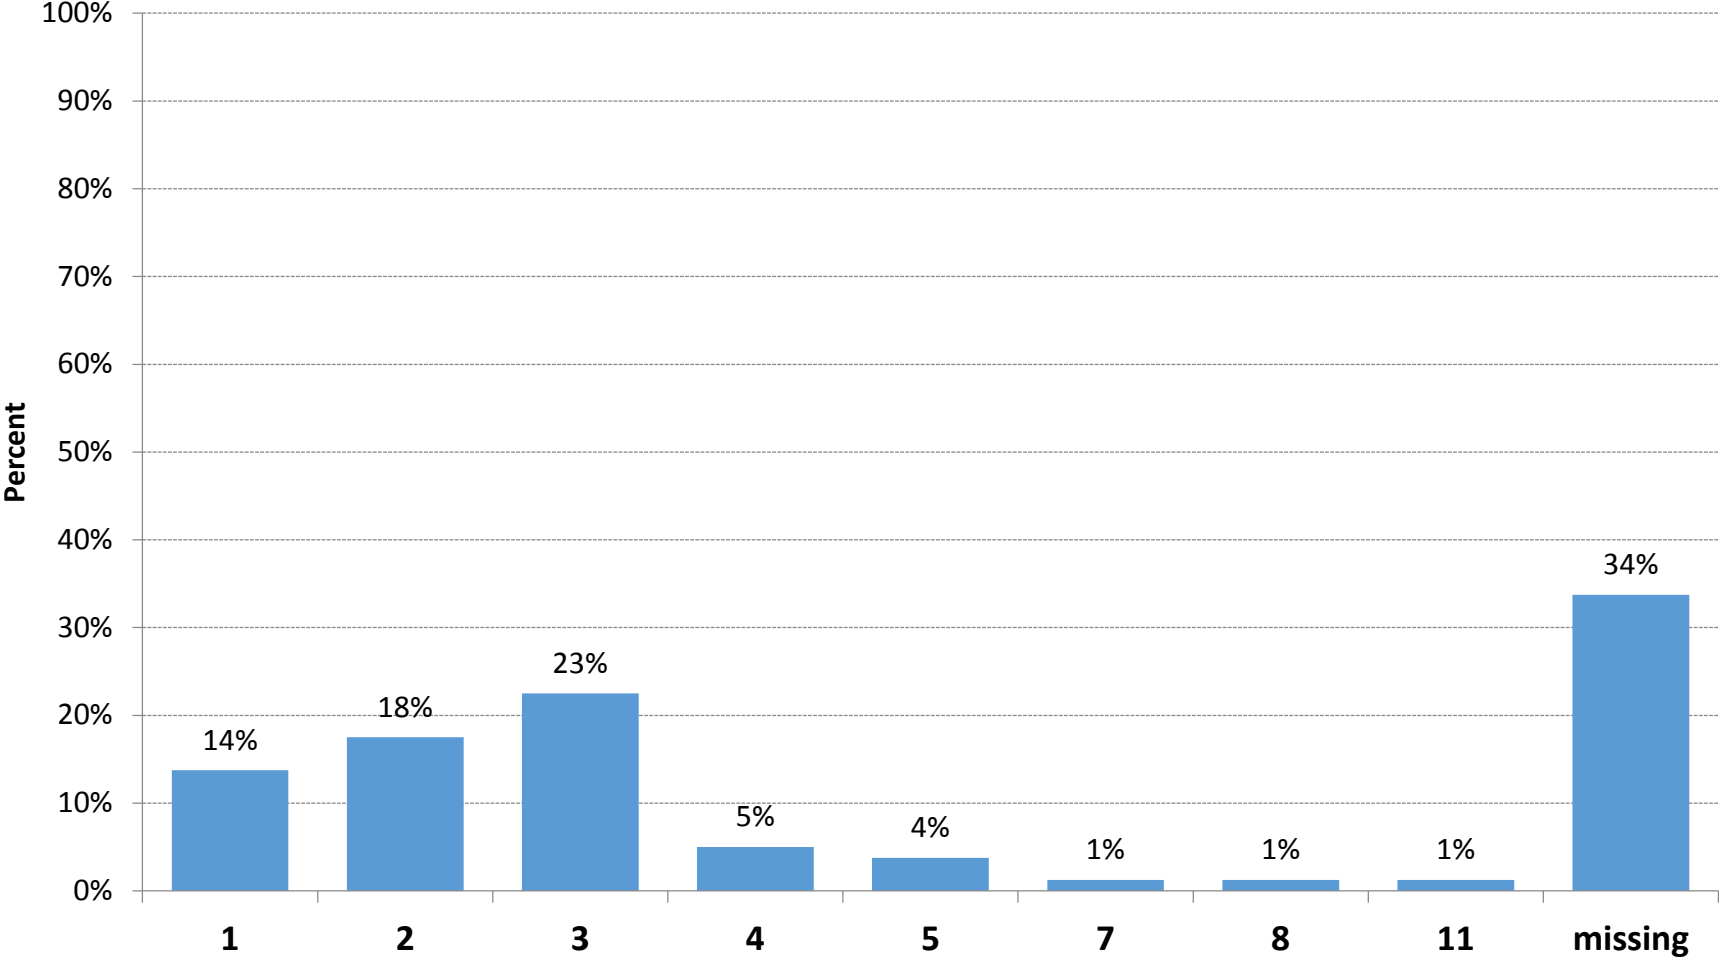

**Figure S2.** Intubator role for first and final intubation attempts

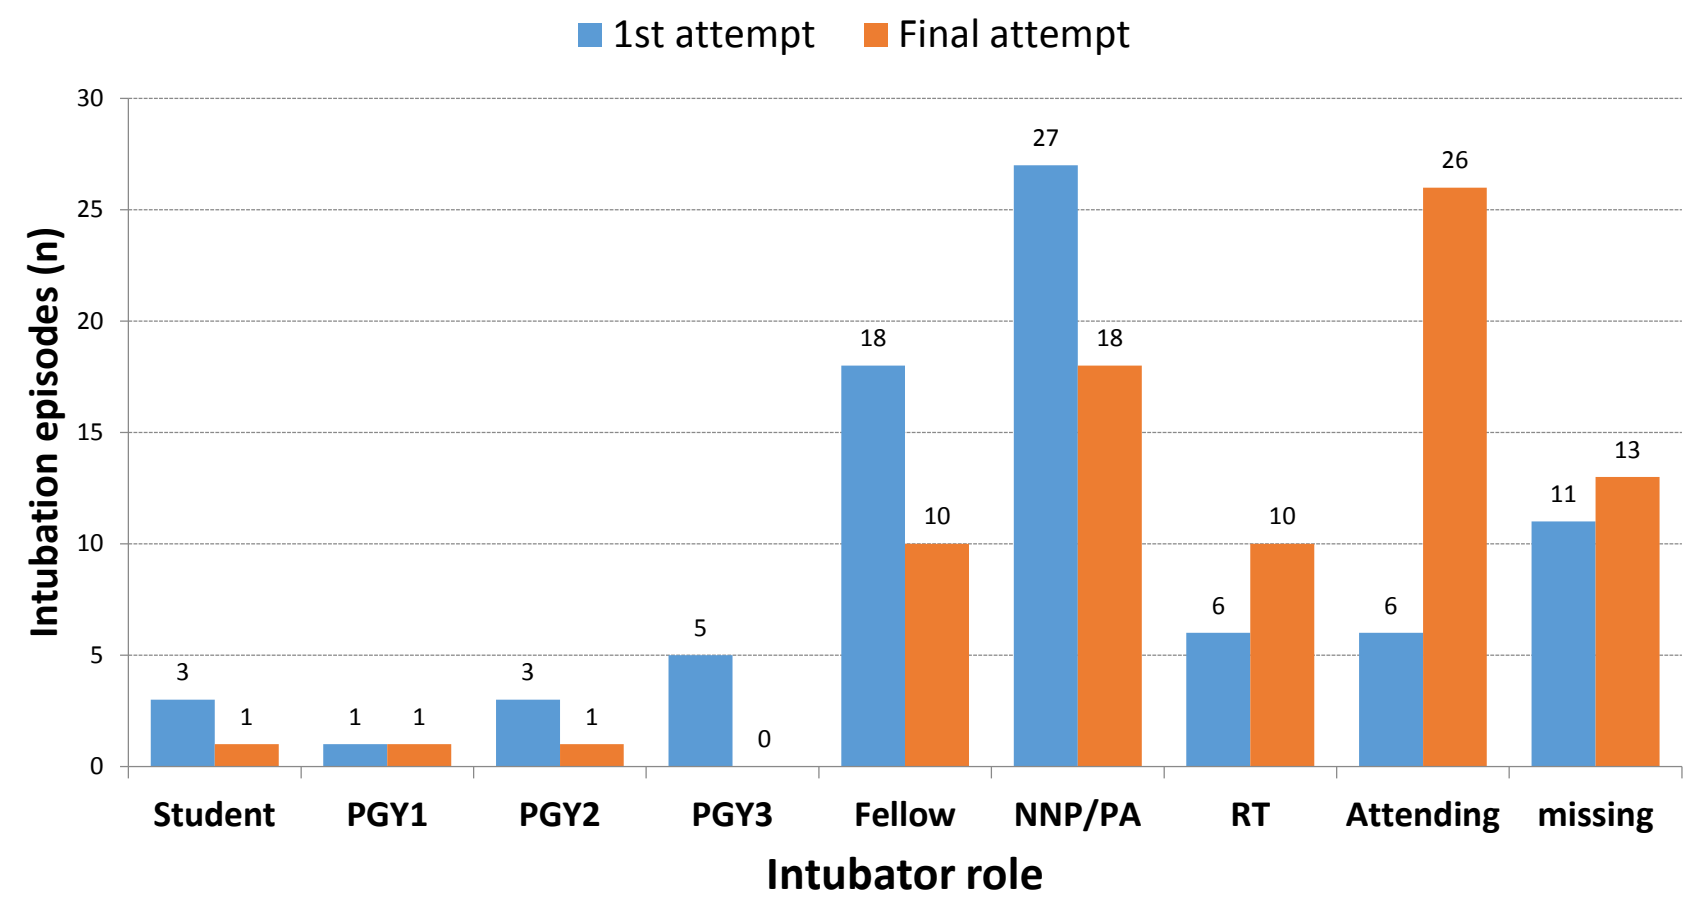

PGY denotes postgraduate year of residency training; NNP/PA, neonatal nurse practitioner or physician’s assistant; RT, respiratory therapist

**Figure S3.** Perceived adverse effects and/or logistical problems with remifentanyl administration amongst various respondent roles

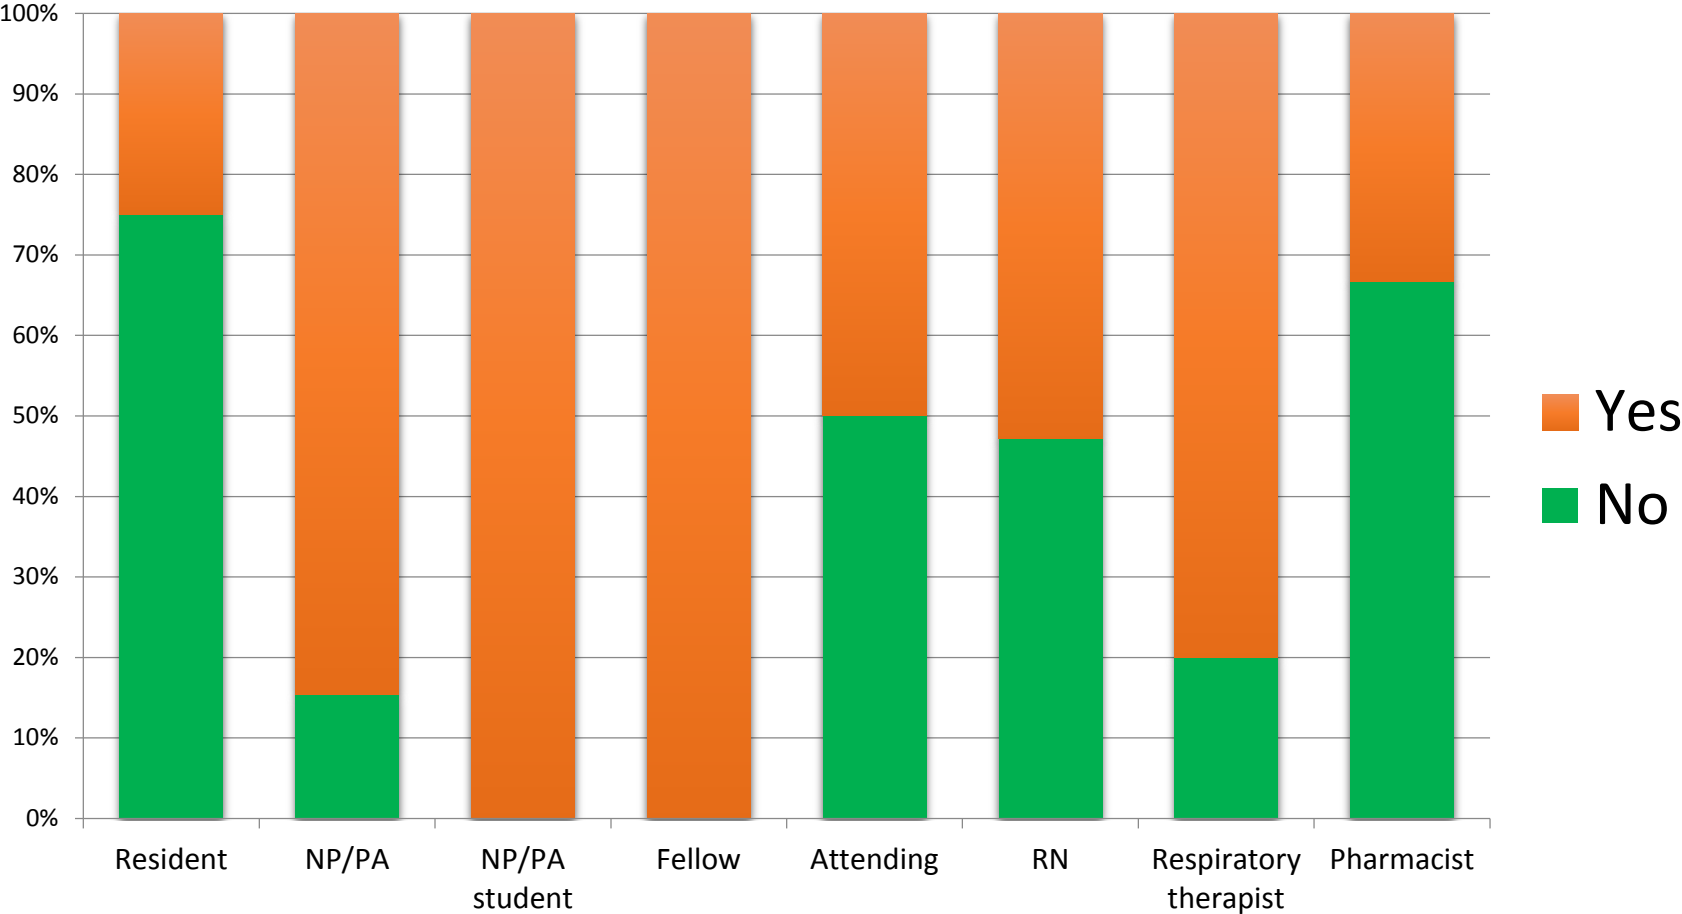

NP/PA, nurse practitioner or physician’s assistant; RN, registered nurse  
There were significant differences in perception of adverse events or drug availability among the various respondent roles (chi square, p=0.03)

**Figure S4.** Observed adverse events, according to survey respondents

Question: Q5\_2\_TEXT: Were there any adverse eff... ▾

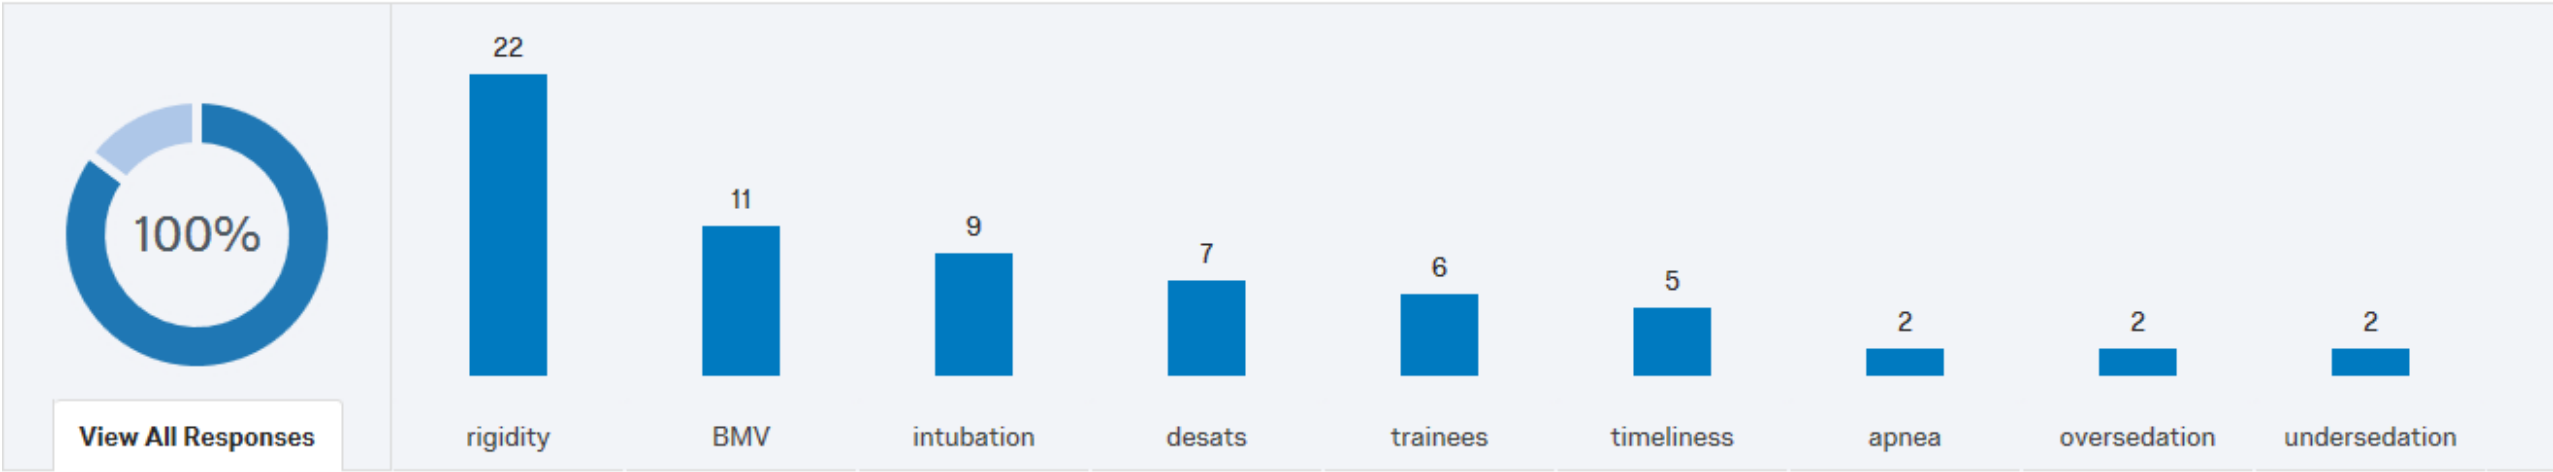

Showing all 61 responses

BMV, bag-mask ventilation; desats, desaturations

**Figure S5.** Perceived satisfaction with remifentanyl premedication amongst various respondent roles

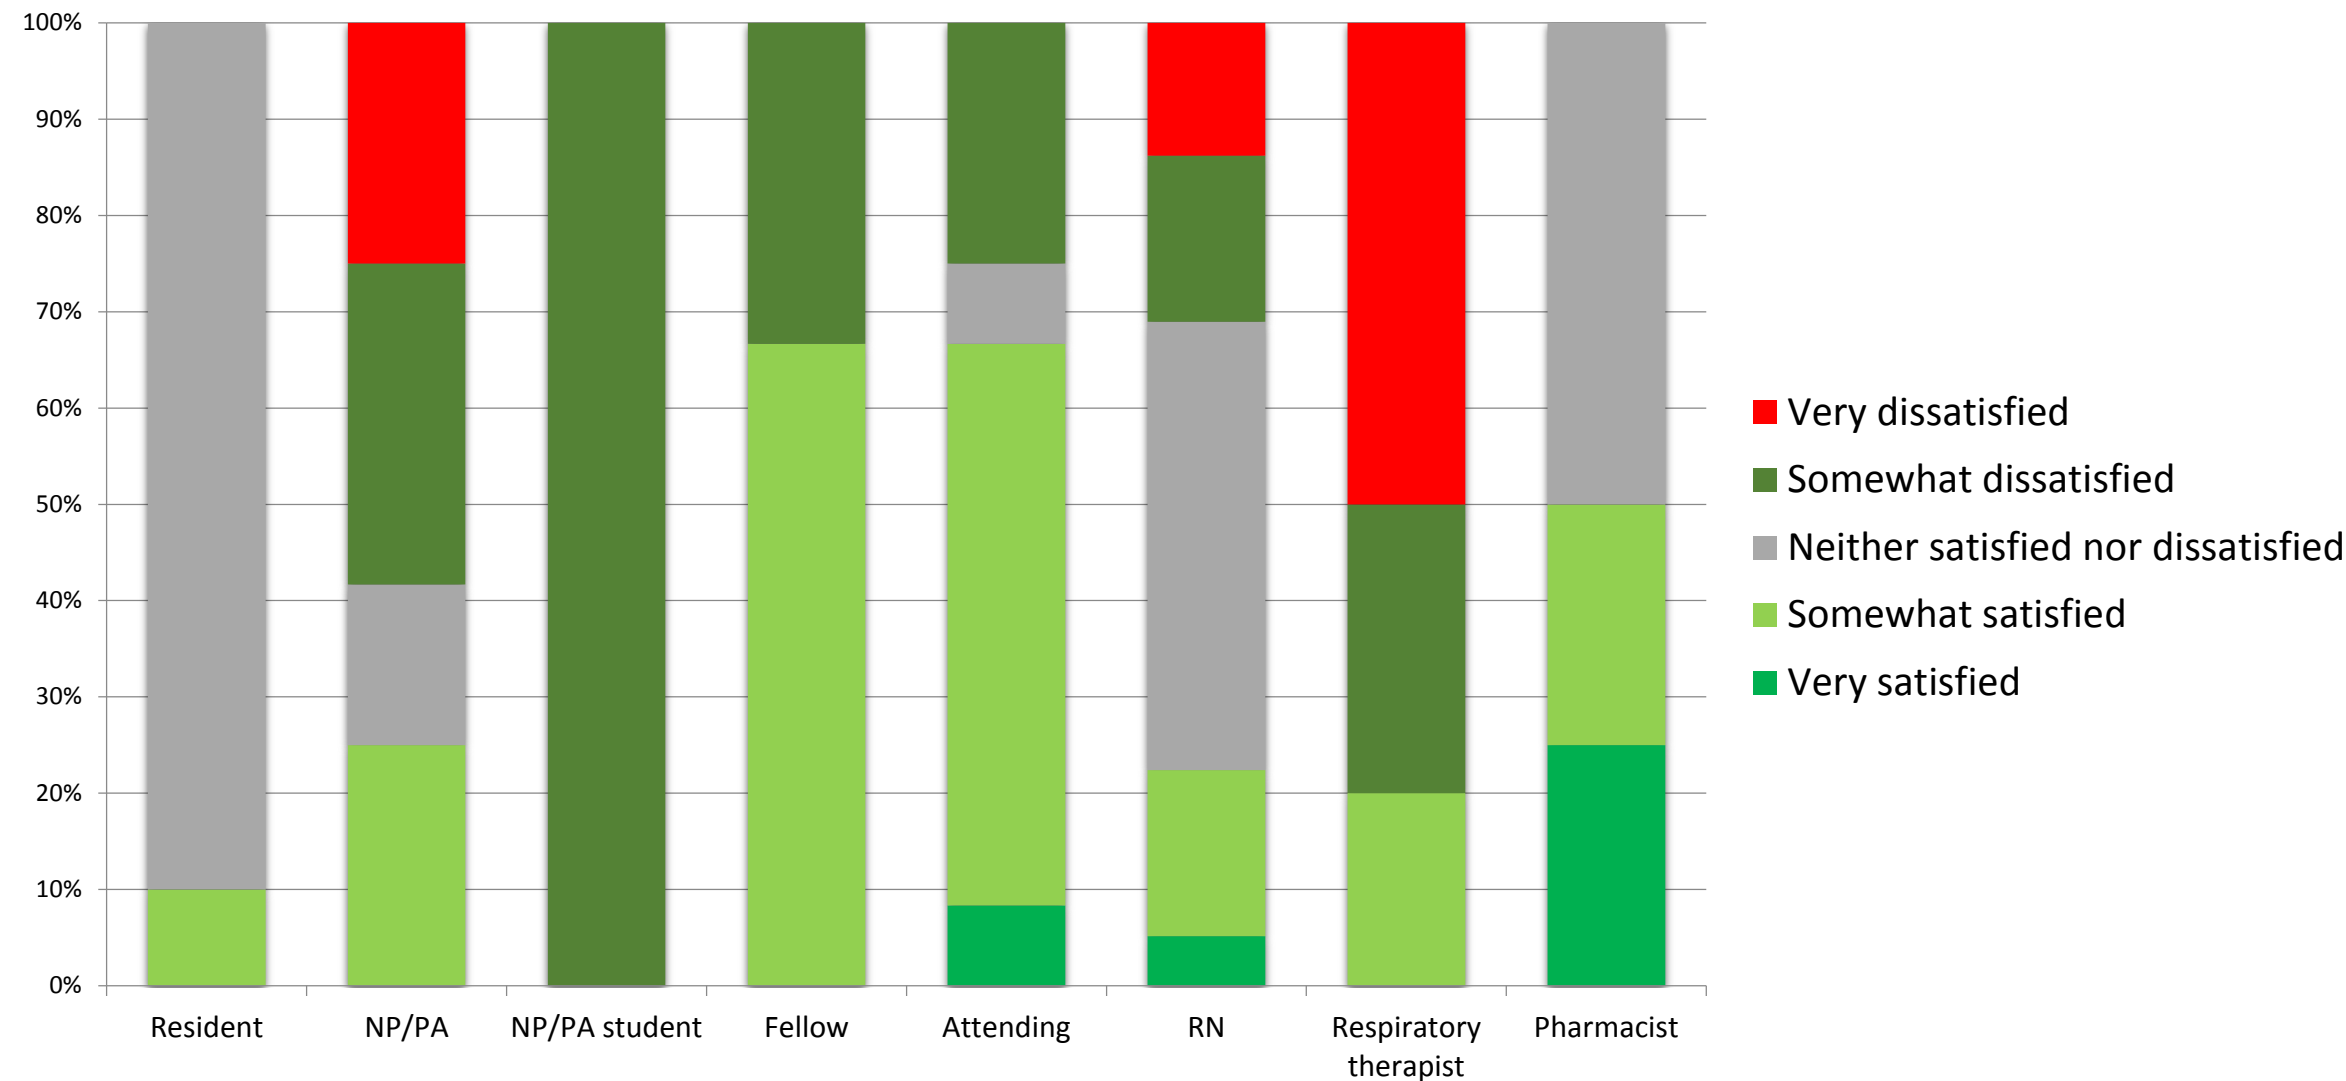

NP/PA, nurse practitioner or physician’s assistant; RN, registered nurse  
There were significant differences in reported satisfaction with remifentanyl premedication among the various respondent roles (chi square,  $p<0.01$ )

**Figure S6.** Perceived effectiveness of remifentanil premedication amongst various respondent roles

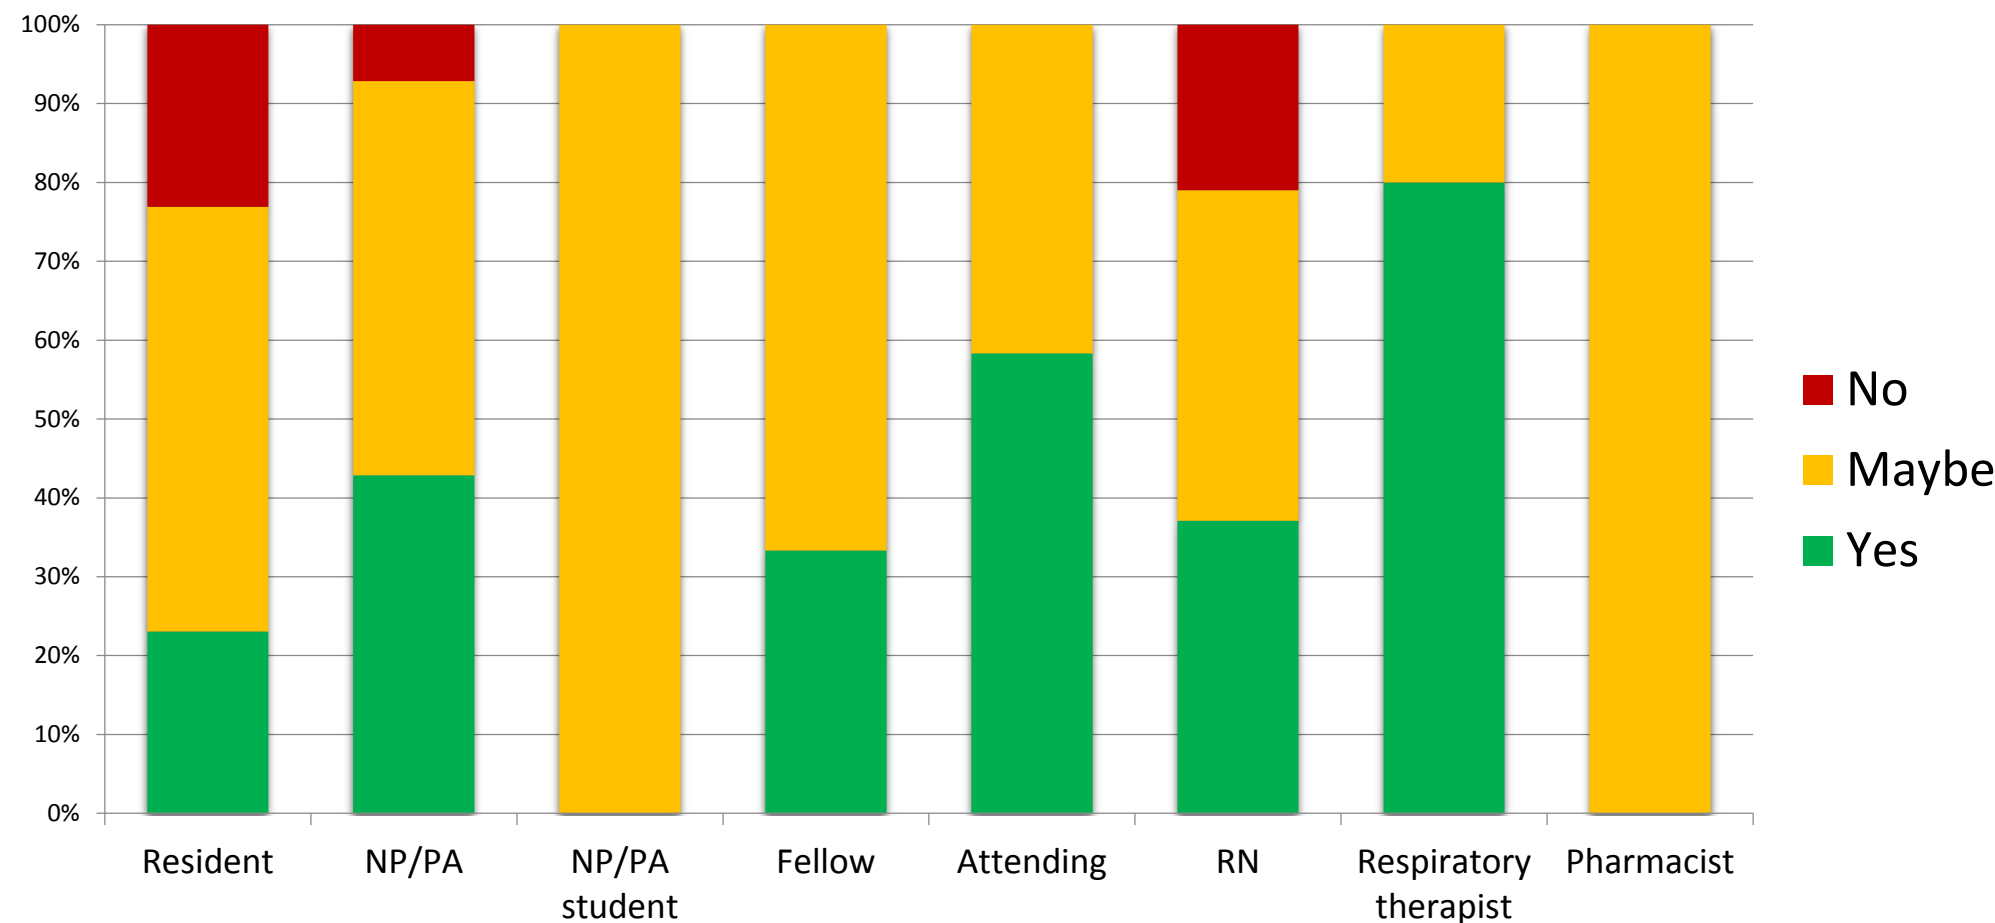

NP/PA, nurse practitioner or physician’s assistant; RN, registered nurse  
There were no significant differences in perceived effectiveness of remifentanil premedication among the various respondent roles (chi square,  $p=0.24$ )
