# Supplementary material for: Efficacy, Safety, and Usability of Remifentanil as Premedication for INSURE in Preterm Neonates
Source: Children (Basel). 2018 May 22;5(5):63. doi: 10.3390/children5050063 (PMC5977045; doi:10.3390/children5050063)
Supplement: Supplementary file 1 [file children-05-00063-s001.zip › Summary + Remifentanil Data 166 + DEIDENTIFIED.xlsx]

## Sheet: Summary
EventID	RepeatDose	Male	Birth_age_days	BirthTime	BWeight	GAwkdy	Hispanic	Race	outborn	Cesarean	Multiple	APG1	APG5	DRETT	RFordertime	RForderage_hrs	RFweekday	RFgivenage_hrs	RFgiven_lag_hrs	RepeatDose	NIPPV_t0	PIP_t0	PEEP_t0	FiO2_t0	SurfOrder_age_hrs	Atropine	Intub_try_N	Intubators_N	Intubator_1st	Intubator_last	Intubation_mins	Surf_Time	Surf_done	Extub_Time	SurfType	Surf_Age_hrs	Surf_Rx_lag_hr	INSURE_duration	PPV_duration	PPV_post_surf	Vent_mode_1hr	Vent_mode_8hr	FiO2_1hr	FiO2_8hr	O2off_age	HFNC_age	CPAP_age	IMV_postSurf	IMV_any
1	0	0	00:00:00	03:50:00	400	26.4286	0	2	0	1	0	7	8	1	11:28:00	2215.63	4	2216.33	0.7	0	0		7	40		0		1	9	9	00:01:00										2	2	40	50					1
2	0	1	00:00:00	12:47:00	1310	31.7143	1	2	0	1	0	7	8	0	16:37:00	27.8333	4	28.3667	0.533333	0	1	20	10	40	27.8333	0	2	2	5	5	00:01:00	00:01:00	00:11:00	00:11:00	1Infasurf/calfactant	28.3833	0.55	00:11:00	00:10:00	00:00:00	1	1	25	21	3		3	0	0
3	0	0	00:00:00	18:57:00	2320	33.4286	0	2	0	0	0	3	8	0	14:17:00	43.3333	3	44.5833	1.25	0	0		6	40	43.3333	0		1	7	7	00:01:00	00:05:00	00:20:00	00:28:00	2Curosurf/poractant	44.6667	1.33333	00:28:00	00:27:00	00:08:00	2	2	40	38	5		5	1	1
4	0	0	00:00:00	22:08:00	880	26	0	1	0	1	0	5	7	1	13:02:00	62.9	3	64.0333	1.13333	0	1	22	10	42	62.9	1	2	2	7	9	00:01:00	00:15:00	00:20:00	00:35:00	1Infasurf/calfactant	64.2833	1.38333	00:35:00	00:34:00	00:15:00	1	1	30	30	25		31	0	0
5	0	0	00:00:00	12:57:00	1430	29.1429	0	1	0	1	0	4	5	0	15:20:00	2.38333	3	3.3	0.916667	0	1	18	8	35	2.38333	1	3	3	5	5	00:05:00	00:05:00	00:32:00	00:32:00	1Infasurf/calfactant	3.38333	1	00:32:00	00:27:00	00:00:00	1	1	27	21	0		8	0	0
6	0	1	00:00:00	20:00:00	2720	37.8571	0	2	1	1	0	9	9	0	11:09:00	15.15	3	18.65	3.5	0	1	10	8	50	15.15	0		1	7	7	00:01:00	00:01:00	00:09:00	00:09:00	2Curosurf/poractant	18.6667	3.51667	00:09:00	00:08:00	00:00:00	1	1	21	21	1		2	0	0
7	0	1	00:00:00	16:00:00	3372	37	0	2	1	0	0	9	9	0	07:55:00	15.9167	7	17.1667	1.25	0	0		6	35	15.9167	1			9	9	00:01:00	00:01:00	00:11:00	00:12:00	3Surfaxin/lucinactant	17.1833	1.26667	00:12:00	00:11:00	00:01:00	0	1	35	24	4		2	0	0
8	0	0	00:00:00	19:00:00	610	23.5714	0	3	0	1	0	4	5	1	21:47:00	794.783	4	795.383	0.6	0	0		9	21		0		1	9	9	00:01:00										2	2	30	23	34		39	1	1
9	0	1	00:00:00	23:59:00	3710	40.7143	0	2	1	1	0	5	8	0	01:26:00	1.45	2	2.11667	0.666667	0	0		6	27	1.45	1	2		9	9	00:01:00	00:13:00	00:23:00	00:24:00	1Infasurf/calfactant	2.33333	0.883333	00:24:00	00:23:00	00:01:00	2	2	28	25	7		2	1	1
10	0	1	00:00:00	23:48:00	1730	31.2857	0	2	0	1	0	8	9	0	06:43:00	6.91667	6	8	1.08333	0	1	20	10	42	6.91667	1		1	7	7	00:01:00	00:01:00	00:42:00	00:42:00	3Surfaxin/lucinactant	8.01667	1.1	00:42:00	00:41:00	00:00:00	1	1	40	35	7	7	15	0	1
11	1	1	00:00:00	23:48:00	1730	31.2857	0	2	0	1	0	8	9	0	13:34:00	37.7667	7	37.8	0.0333333	1	1	24	10	60	37.7667	0	3	2	5	7	00:11:00	00:14:00	00:23:00	00:25:00	3Surfaxin/lucinactant	38.0333	0.266667	00:25:00	00:14:00	00:02:00	1	1	80	70	7	21	15	0	1
12	0	1	00:00:00	20:00:00	1200	27.4286	0	1	0	1	1	5	7	0	00:17:00	4.28333	5	4.66667	0.383333	0	0		0	45	4.28333	0	3	3	3	7	00:08:00	00:13:00	00:23:00	00:24:00	1Infasurf/calfactant	4.88333	0.6	00:24:00	00:16:00	00:01:00	2	2	21	21	80		72	1	1
13	0	0	00:00:00	08:17:00	1670	30	0	2	0	1	0	9	9	0	15:06:00	6.81667	3	7.95	1.13333	0	1	18	6	42	6.81667	1			9	9	00:01:00	00:01:00	00:11:00	00:12:00	3Surfaxin/lucinactant	7.96667	1.15	00:12:00	00:11:00	00:01:00	1	1	26	30	4		2	0	0
14	0	0	00:00:00	03:43:00	2455	35.1429	0	2	0	0	0	6	8	0	11:29:00	7.76667	7	8.88333	1.11667	0	0		6	35	7.76667	1		1	4	4	00:01:00	00:04:00	00:04:00	04:03:00	3Surfaxin/lucinactant	8.95	1.18333	04:03:00	04:02:00	03:59:00	2	1	21	34	3		5	1	1
15	1	0	00:00:00	03:43:00	2455	35.1429	0	2	0	0	0	6	8	0	13:07:00	57.4	2	58.6333	1.23333	1	0		6	30	57.4	1	2	1	6	6	00:01:00	00:20:00	00:41:00	10:44:00	3Surfaxin/lucinactant	58.9667	1.56667	10:44:00	10:43:00	10:03:00	2	1	21	26	4		5	1	1
16	0	1	00:00:00	06:09:00	3290	34.7143	0	2	0	0	0	7	8	0	09:31:00	27.3667	2	28.9167	1.55	0	1	18	6	38	27.3667	1		1	5	5	00:01:00	00:06:00	00:20:00	00:46:00	3Surfaxin/lucinactant	29.0167	1.65	00:46:00	00:45:00	00:26:00	1	1	40	34	3		4	0	0
17	0	1	00:00:00	08:25:00	1950	34	0	2	0	0	0	7	8	0	04:45:00	44.3333	6	46.3167	1.98333	0	1	14	7	40	44.3333	1	3	1	7	7	00:14:00	00:14:00	00:24:00	00:27:00	3Surfaxin/lucinactant	45.1667	0.833333	00:27:00	00:13:00	00:03:00	1	1	40	21	2		5	0	0
18	0	0	00:00:00	17:25:00	1030	27.5714	0	1	1	0	0	3	5	0	22:44:00	29.3167	5	30.2333	0.916667	0	1	24	12	25	29.3167	1	3	2	4	7	00:01:00	00:01:00	00:11:00	00:11:00	3Surfaxin/lucinactant	30.25	0.933333	00:11:00	00:10:00	00:00:00	2	2	21	21	2		46	1	1
19	0	1	00:00:00	09:20:00	910	27.5714	1	1	0	1	0	7	8	0	12:10:00	2.83333	6	4.33333	1.5	0	1	22	8	40	2.83333	1	3	2	5	7	00:01:00	00:01:00	00:11:00	08:42:00	3Surfaxin/lucinactant	4.35	1.51667	08:42:00	08:41:00	08:31:00	2	2	21	21	10	36	8	1	1
20	0	0	00:00:00	21:32:00	980	27.7143	0	2	0	1	1	6	8	0	13:03:00	15.5167	3	16.3	0.783333	0	1	26	12	90	15.5167	0	7	3	0	7	00:18:00	00:23:00	00:33:00	00:33:00	3Surfaxin/lucinactant	16.6833	1.16667	00:33:00	00:15:00	00:00:00	2	2	60	30	43	58	50	1	1
21	0	1	00:00:00	23:33:00	1320	29.4286	0	2	0	1	0	2	6	0	14:44:00	39.1833	1	40.8667	1.68333	0	1	24	8	43	39.1833	1	2	2	5	7	00:20:00	00:20:00	00:20:00	00:25:00	1Infasurf/calfactant	41.2	2.01667	00:25:00	00:05:00	00:05:00	1	1	75	23	3		7	0	0
22	0	0	00:00:00	09:39:00	1230	30.7143	0	1	0	1	0	2	8	0	13:31:00	3.86667	4			0	1	25	11	40	3.86667	1	3	2	4	7	00:01:00	03:27:00	03:37:00	08:26:00	3Surfaxin/lucinactant	3.45		08:26:00	08:25:00	04:49:00	2	1	25	21	0	16	3	1	1
23	0	0	00:00:00	20:49:00	1750	32.2857	0	2	0	1	1	3	8	0	15:38:00	18.8167	4	20.3	1.48333	0	1	18	7	25	18.8167	1	1	1	5	5	00:13:00	00:13:00	00:18:00	00:18:00	3Surfaxin/lucinactant	20.5167	1.7	00:18:00	00:05:00	00:00:00	1	1	28	23	2		6	0	0
24	0	0	00:00:00	20:50:00	1300	32.2857	0	2	0	1	1	5	8	0	15:36:00	18.7667	4	21.9333	3.16667	0	1	10	8	40	18.7667	1	1	1	5	5	00:01:00	00:01:00	00:01:00	00:44:00	3Surfaxin/lucinactant	21.95	3.18333	00:44:00	00:43:00	00:43:00	1	1	40	29	2		6	0	0
25	0	1	00:00:00	20:27:00	1250	28.4286	0	2	0	1	0	5	5	0	01:08:00	4.68333	7	5.33333	0.65	0	1	22	0	52	4.68333	0	1	1	5	5	00:01:00	00:01:00	00:23:00	00:23:00	3Surfaxin/lucinactant	5.35	0.666667	00:23:00	00:22:00	00:00:00	2	2	22	21	5		24	1	1
26	0	1	00:00:00	10:59:00	1430	30.7143	0	1	0	1	0	7	8	0	16:35:00	5.6	5	6.18333	0.583333	0	0		6	35	5.6	1		1	4	4	00:10:00	00:10:00	00:26:00	00:26:00	3Surfaxin/lucinactant	6.35	0.75	00:26:00	00:16:00	00:00:00	0	0	25	21	3		5	0	0
27	0	0	00:00:00	17:10:00	2030	34.1429	0	2	1	0	0			0	21:24:00	4.23333	5	5.3	1.06667	0	1	15	7	50	4.23333	1	3	3	5	6	00:27:00	00:27:00	00:47:00	02:32:00	3Surfaxin/lucinactant	5.75	1.51667	02:32:00	02:05:00	01:45:00	2	2	40	21	1		6	1	1
28	0	0	00:00:00	16:13:00	2075	33.1429	0	2	0	1	0	4	7	0	13:55:00	21.7	5	22.9833	1.28333	0	1	20	10	21	21.7	1		1	4	4	00:01:00	00:02:00	00:12:00	00:14:00	1Infasurf/calfactant	23.0167	1.31667	00:14:00	00:13:00	00:02:00	1	1	27	34	4		5	0	0
29	0	1	00:00:00	17:15:00	1640	30	0	2	1	0	0	8	9	0	19:50:00	2.58333	6	3.28333	0.7	0	1	24	10	50	2.58333	1	1	1	5	5	00:03:00	00:05:00	00:15:00	00:18:00	3Surfaxin/lucinactant	3.36667	0.783333	00:18:00	00:15:00	00:03:00	1	1	38	21	0		15	0	1
30	0	1	00:00:00	05:48:00	2610	34.7143	0	2	0	1	0	5	8	0	15:45:00	33.95	6	34.7833	0.833333	0	1	24	10	45	33.95	1	1	1	5	5	00:01:00	00:02:00	00:11:00	00:14:00	1Infasurf/calfactant	34.8167	0.866667	00:14:00	00:13:00	00:03:00	1	1	30	38	9		5	0	0
31	1	1	00:00:00	05:48:00	2610	34.7143	0	2	0	1	0	5	8	0	09:07:00	51.3167	7	53.4	2.08333	1	1	24	10	29	51.3167	1	1	1	5	5	00:01:00	00:02:00	00:07:00	00:10:00	1Infasurf/calfactant	53.4333	2.11667	00:10:00	00:09:00	00:03:00	1	1	29	28	9		5	0	0
32	0	1	00:00:00	11:29:00	1260	28.4286	0	2	0	1	0	2	5	0	16:57:00	5.46667	3	6.55	1.08333	0	1	24	8	40	5.46667	1	5	3	3	7	00:25:00	00:25:00	00:31:00	00:47:00	1Infasurf/calfactant	6.96667	1.5	00:47:00	00:22:00	00:16:00	1	0	21	21	67	61	12	0	1
33	1	1	00:00:00	11:29:00	1260	28.4286	0	2	0	1	0	2	5	0	23:54:00	12.4167	3	13.0167	0.6	1	0		6	40	12.4167	1	11	4	3	7	01:06:00					12.5167	0.1				2	2	100	21	3		12	1	1
34	0	0	00:00:00	23:02:00	1360	29.8571	0	5	0	1	0	7	8	0	05:15:00	6.21667	2	6.4	0.183333	0	1	18	7	41	6.21667	1	3	2	3	7	00:02:00	00:14:00	00:18:00	00:30:00	1Infasurf/calfactant	6.63333	0.416667	00:30:00	00:28:00	00:12:00	1	1	21	32	6		6	0	0
35	0	0	00:00:00	10:20:00	1330	29.5714	0	2	0	0	0	9	8	0	05:43:00	19.3833	6	22.8167	3.43333	0	1	16	8	40	19.3833	1		1	4	4	00:04:00	00:16:00	00:23:00	00:24:00	1Infasurf/calfactant	23.0833	3.7	00:24:00	00:20:00	00:01:00	1	1	26	21	1		4	0	0
36	0	0	00:00:00	14:11:00	3560	34	0	2	0	1	0	6	7	0	17:52:00	3.68333	6	4.21667	0.533333	0	1	22	9	45	3.68333	1	1	1	1	1	00:01:00	00:01:00	00:16:00	00:16:00	1Infasurf/calfactant	4.23333	0.55	00:16:00	00:15:00	00:00:00	1	1	25	21	0		2	0	0
37	0	0	00:00:00	16:48:00	2965	37	0	2	0	0	0	9	9	0	17:58:00	25.1667	5	26.4	1.23333	0	1	16	6	30	25.1667	1	5	2	4	7	00:18:00	00:18:00	00:28:00	00:28:00	1Infasurf/calfactant	26.7	1.53333	00:28:00	00:10:00	00:00:00	1	1	25	29	4		6	0	0
38	0	0	00:00:00	21:46:00	2060	33.4286	0	1	0	1	0	8	9	0	22:56:00	25.1667	4	26.3667	1.2	0	1	20	8	34	25.1667	1	3	3	5	5	00:22:00	00:23:00	00:32:00	00:32:00	1Infasurf/calfactant	26.75	1.58333	00:32:00	00:10:00	00:00:00	1	1	40	32	4		5	0	0
39	1	0	00:00:00	21:46:00	2060	33.4286	0	1	0	1	0	8	9	0	15:49:00	42.05	5	42.65	0.6	1	1	20	8	38	42.05	1	1	1	6	6	00:04:00	00:05:00	00:33:00	00:33:00	1Infasurf/calfactant	42.7333	0.683333	00:33:00	00:29:00	00:00:00	1	1	40	32	5	7	5	0	0
40	0	1	00:00:00	07:00:00	2554	36.1429	0	2	1	1	0	8	9	0	06:26:00	47.4333	7	50.5	3.06667	0	0		6	50	47.4333	1	3	2	5	7	00:15:00	00:15:00	00:25:00	00:50:00	1Infasurf/calfactant	50.75	3.31667	00:50:00	00:35:00	00:25:00	0	0	50	30	4	8	5	0	0
41	0	1	00:00:00	08:00:00	1500	30.5714	0	2	0	1	1	9	9	0	08:23:00	24.3833	1	26.2333	1.85	0	1	16	6	40	24.3833	1		0	0	0	00:01:00	00:03:00	00:06:00	00:21:00	1Infasurf/calfactant	26.2833	1.9	00:21:00	00:20:00	00:15:00	1	1	25	23	25	47	6	0	0
42	0	1	00:00:00	19:06:00	1250	28.1429	0	2	0	1	0	5	9	0	21:29:00	26.3833	1	27.3167	0.933333	0	1	22	8	40	26.3833	1	2	2	2	7	00:14:00	00:16:00	00:18:00	00:21:00	1Infasurf/calfactant	27.5833	1.2	00:21:00	00:07:00	00:03:00	1	1	23	21	5		8	0	0
43	1	1	00:00:00	19:06:00	1250	28.1429	0	2	0	1	0	5	9	0	21:18:00	50.2	2	57.5833	7.38333	1	1	22	8	40	50.2	1	2	1	2	2	00:10:00	00:13:00	00:15:00	00:27:00	1Infasurf/calfactant	57.8	7.6	00:27:00	00:17:00	00:12:00	1	1	36	26	5		8	0	0
44	0	1	00:00:00	14:45:00	4150	40.7143	0	2	1	0	0	2	2	0	19:19:00	4.56667	4	5.5	0.933333	0	0		6	40	4.56667	1	3	2	5	6	00:05:00	00:15:00	00:25:00	00:26:00	2Curosurf/poractant	5.75	1.18333	00:26:00	00:21:00	00:01:00	0	0	21	21	0		1	0	0
45	0	1	00:00:00	23:59:00	3155	37	0	2	1	1	0	9	9	0	17:39:00	17.6667	5	18.1333	0.466667	0	0		7	45	17.6667	1		1	4	4	00:02:00	00:03:00	00:13:00	00:14:00	2Curosurf/poractant	18.1833	0.516667	00:14:00	00:12:00	00:01:00	0	2	23	37	5		6	1	1
46	0	0	00:00:00	11:56:00	1120	33	0	2	0	1	0	9	6	0	21:45:00	33.8167	2	34.6167	0.8	0	1	20	10	41	33.8167	1	2	1	7	7	00:01:00	00:41:00	00:51:00	00:52:00	1Infasurf/calfactant	35.3	1.48333	00:52:00	00:51:00	00:01:00	1	1	28	24	4		5	0	0
47	0	0	00:00:00	19:40:00	2624	34.5714	0	2	1	0	0	6	8	0	00:09:00	28.4833	3	29.25	0.766667	0	0		5	36	28.4833	1	3	2	5	7	00:10:00	00:10:00	00:28:00	00:28:00	1Infasurf/calfactant	29.4167	0.933333	00:28:00	00:18:00	00:00:00	0	0	23	21	3		2	0	0
48	0	1	00:00:00	16:50:00	1320	31.7143	0	2	0	1	0	8	9	0	16:53:00	24.05	4	25.8333	1.78333	0	1	22	7	42	24.05	1		1	4	4	00:01:00	00:01:00	00:11:00	00:12:00	1Infasurf/calfactant	25.85	1.8	00:12:00	00:11:00	00:01:00	1	1	26	26	3		5	0	0
49	0	1	00:00:00	13:20:00	2860	35	0	2	1	1	0	8	8	0	12:49:00	47.4833	4	48.3667	0.883333	0	1	20	8	29	47.4833	1	4	3	2	7	00:01:00	00:11:00	00:27:00	00:33:00	1Infasurf/calfactant	48.55	1.06667	00:33:00	00:32:00	00:06:00	0	0	21	23	3		3	0	0
50	0	1	00:00:00	09:15:00	1200	28.7143	0	2	1	0	1	1	8	0	13:03:00	3.8	4	5.48333	1.68333	0	1	22	8	30	3.8	1		1	5	5	00:01:00	00:01:00	00:11:00	00:12:00	1Infasurf/calfactant	5.5	1.7	00:12:00	00:11:00	00:01:00	1	1	25	21	13		20	0	0
51	0	0	00:00:00	09:15:00	1120	28	0	2	1	0	1			0	13:04:00	3.81667	4	5.68333	1.86667	0	1	22	8	36	3.81667	0	5	3	4	7	00:01:00	00:19:00	00:29:00	00:34:00	1Infasurf/calfactant	6	2.18333	00:34:00	00:33:00	00:05:00	1	1	21	21	13	62	25	0	0
52	1	0	00:00:00	09:15:00	1120	28	0	2	1	0	1			0	13:33:00	28.3	5	28.9333	0.633333	1	1	20	8	33	28.3	1	2	1	4	4	00:19:00	00:19:00	00:29:00	00:30:00	1Infasurf/calfactant	29.25	0.95	00:30:00	00:11:00	00:01:00	1	1	21	21	13		25	0	0
53	0	1	00:00:00	08:05:00	1320	30.1429	0	1	0	0	0	2	5	0	14:17:00	54.2	7	55.4167	1.21667	0	1	22	10	34	54.2	1	4	2	5	7	00:01:00	00:30:00	00:40:00	00:41:00	1Infasurf/calfactant	55.9167	1.71667	00:41:00	00:40:00	00:01:00	1	1	34	29	3		8	0	0
54	1	1	00:00:00	08:05:00	1320	30.1429	0	1	0	0	0	2	5	0	14:18:00	54.2167	7			1
55	0	1	00:00:00	23:19:00	2938	35.5714	0	2	1	0	0	9	9	0	00:12:00	0.883333	2			0
56	1	1	00:00:00	23:19:00	2938	35.5714	0	2	0	0	0	9	9	0	18:37:00	19.3	2	19.7	0.4	1	0		7	27	19.3	1	1	1	5	5	00:02:00	00:02:00	00:14:00	00:17:00	1Infasurf/calfactant	19.7333	0.433333	00:17:00	00:15:00	00:03:00	0	0	25	21	1		3	0	0
57	0	1	00:00:00	10:29:00	3250	37.4286	0	1	0	1	0	6	5	0	18:39:00	32.1667	4	38.9833	6.81667	0	0		7	40	32.1667	1		1	6	6	00:02:00	00:02:00	00:12:00	00:15:00	1Infasurf/calfactant	39.0167	6.85	00:15:00	00:13:00	00:03:00	0	0	30	31	5		5	0	0
58	0	0	00:00:00	08:21:00	2100	32.7143	0	1	0	0	0	8	8	0	00:19:00	15.9667	3	16.5667	0.6	0	0		7	34	15.9667	1	1	1	6	6	00:01:00	00:10:00	00:20:00	00:21:00	1Infasurf/calfactant	16.7333	0.766667	00:21:00	00:20:00	00:01:00	0	0	21	21	2		5	0	0
59	0	0	00:00:00	10:43:00	770	24	0	1	1	0	0	7	8	1	12:30:00	169.783	4	169.783			1	20	8	34	169.783	1		0	9	9	00:01:00	00:01:00	00:11:00	00:14:00	1Infasurf/calfactant	169.8	0.0166667	00:14:00	00:13:00	00:03:00	1	1	30	30	72			0	1
60	0	0	00:00:00	13:45:00	720	27.2857	0	2	0	1	0	4	8	0	07:13:00	17.4667	5		1.1	0	1	20	7	80	17.4667	1		1	5	5					1Infasurf/calfactant	18.75	1.28333				2	2	35	28	69	7	43	1	1
61	0	1	00:00:00	12:20:00	960	27.1429	0	2	0	0	0	1	5	1	18:19:00	29.9833	3	31.6833	1.7	0	1	22	9	34	29.9833	1		2	4	7	00:01:00	00:14:00	00:17:00	00:24:00	1Infasurf/calfactant	31.9167	1.93333	00:24:00	00:23:00	00:07:00	1	1	25	27	5		35	0	1
62	0	0	00:00:00	11:25:00	2150	30.8571	0	2	0	1	0	5	7	0	13:13:00	1.8	4	3.2	1.4	0	1	22	10	50	1.8	1	1	1	5	5	00:05:00	00:09:00	00:13:00	00:21:00	1Infasurf/calfactant	3.35	1.55	00:21:00	00:16:00	00:08:00	1	1	40	21	0		2	0	0
63	0	1	00:00:00	22:00:00	1010	27.1429	0	2	0	1	0	7	8	0	00:03:00	2.05	1		0.68	0	1	10	20	55	2.05	1	3	2	5	5					1Infasurf/calfactant	2.8	0.75				2	2	25	30	45		97	1	1
64	0	1	00:00:00	09:24:00	1040	29	0	2	0	1	0	6	8	0	22:16:00	12.8667	3	14.0833	1.21667	0	1	20	6	35	12.8667	1	3	2	3	5	00:04:00	00:08:00	00:22:00	00:22:00	1Infasurf/calfactant	14.2167	1.35	00:22:00	00:18:00	00:00:00	1	1	21	21	4		9	0	0
65	1	1	00:00:00	09:24:00	1040	29	0	2	0	1	0	6	8	0	09:18:00	71.9	6	74.2167	2.31667	1	1	20	8	34	71.9	0		1	4	9	00:01:00	00:01:00	00:19:00	00:19:00	1Infasurf/calfactant	74.2333	2.33333	00:19:00	00:18:00	00:00:00	1	1	28	24	4		9	0	0
66	0	1	00:00:00	09:00:00	2170	35	0	2	1	1	0	7	9	0	18:17:00	33.2833	6	33.8833	0.6	0	0		7	38	33.2833	1	2	2	5	7	00:07:00	00:08:00	00:12:00	00:14:00	1Infasurf/calfactant	34.0167	0.733333	00:14:00	00:07:00	00:02:00	0	0	25	38	4	5	2	0	0
67	1	1	00:00:00	09:00:00	2170	35	0	2	0	1	0	7	9	0	09:02:00	48.0333	7	48.3	0.266667	1	0		7	40	48.0333	1	4	2	5	7	00:06:00	00:07:00	00:13:00	00:13:00	1Infasurf/calfactant	48.4167	0.383333	00:13:00	00:07:00	00:00:00	0	2	50	60	4	5	2	1	0
68	0	0	00:00:00	10:25:00	860	29	0	2	0	1	0	3	6	0	13:59:00	3.56667	3	4.16667	0.6	0	1	18	7	50	3.56667	1	8	3	4	6	00:11:00	00:12:00	00:22:00	00:23:00	1Infasurf/calfactant	4.36667	0.8	00:23:00	00:12:00	00:01:00	1	2	45	43	6	7	54	1	1
69	0	1	00:00:00	23:59:00	3799	37.8571	0	2	1	1	0	8	8	0	15:11:00	39.2	2	40.3	1.1	0	0		5	32	39.2	1	2	2	6	7	00:03:00	00:06:00	00:11:00	00:11:00	2Curosurf/poractant	40.4	1.2	00:11:00	00:08:00	00:00:00	0	0	24	23	3		4	0	0
70	1	1	00:00:00	23:59:00	3799	37.8571	0	2	0	1	0	8	8	0			3			1
71	0	0	00:00:00	09:00:00	790	28.1429	0	2	0	1	0	8	1	0	13:35:00	4.58333	5	5.48333	0.9	0	0		6	21	4.58333	1	3	2	5	5	00:15:00	00:17:00	00:32:00	00:39:00	1Infasurf/calfactant	5.76667	1.18333	00:39:00	00:24:00	00:07:00	2	2	21	23	2		10	1	1
72	0	1	00:00:00	02:00:00	980	28.8571	0	1	1	1	0	4	8	0	05:44:00	27.7333	7	28.3333	0.6	0	1	17	7	45	27.7333	1	2	2	0	5	00:13:00	00:13:00	00:22:00	00:22:00	1Infasurf/calfactant	28.55	0.816667	00:22:00	00:09:00	00:00:00	1	1	45	21	4		6	0	0
73	0	1	00:00:00	11:29:00	2090	30.5714	0	2	0	1	0	7	8	0	14:52:00	3.38333	5	4.13333	0.75	0	1	18	7	44	3.38333	0	2	1	4	4	00:01:00	00:01:00	00:11:00	00:11:00	1Infasurf/calfactant	4.15	0.766667	00:11:00	00:10:00	00:00:00	1	1	26	38	1		5	0	1
74	0	1	00:00:00	15:37:00	1990	32.8571	0	2	0	1	1	6	8	0	01:31:00	33.9	1	35.4667	1.56667	0	1	20	8	35	33.9	1	2	1	4	4	00:01:00	00:01:00	00:11:00	00:11:00	1Infasurf/calfactant	35.4833	1.58333	00:11:00	00:10:00	00:00:00	1	1	25	21	2		4	0	0
75	0	0	00:00:00	22:16:00	2220	34	0	2	0	1	1	5	8	0	03:33:00	29.2833	1	31.25	1.96667	0	0		6	32	29.2833	1	3	2	4	6	00:11:00	00:14:00	00:17:00	00:22:00	1Infasurf/calfactant	31.4833	2.2	00:22:00	00:11:00	00:05:00	0	0	25	23	2		3	0	0
76	0	1	00:00:00	17:22:00	980	26.8571	0	2	0	1	1	8	8	0	18:00:00	24.6333	1			0					24.6333
77	1	1	00:00:00	17:22:00	980	26.8571	0	2	0	1	1	8	8	0	15:01:00	69.65	3	70.4667	0.816667	1	1	18	7	31	69.65	1	3	1	9	9	00:01:00	00:10:00	00:19:00	00:19:00	1Infasurf/calfactant	70.6333	0.983333	00:19:00	00:18:00	00:00:00	1	1	31	22	76	74	43	0	0
78	0	1	00:00:00	01:32:00	1380	27.2857	0	2	0	0	0	4	7	0	04:30:00	2.96667	2	3.3	0.333333	0	0		7	40	2.96667	1	4	2	5	6	00:01:00	00:20:00	00:30:00	00:30:00	1Infasurf/calfactant	3.63333	0.666667	00:30:00	00:29:00	00:00:00	0	0	30	21	77	70	49	0	0
79	0	1	00:00:00	18:20:00	1220	30.5714	0	2	0	1	0	3	6	0	21:20:00	3	6	5.16667	2.16667	0	1	20	7	28	3	1		1	6	6	00:01:00	00:02:00	00:13:00	00:17:00	1Infasurf/calfactant	5.2	2.2	00:17:00	00:16:00	00:04:00	2	1	21	21	37	37	39	1	1
80	0	0	00:00:00	11:01:00	1790	32.7143	0	2	1	0	0	4	8	0	12:57:00	1.93333	2	3.36667	1.43333	0	1	17	7	70	1.93333	1		1	4	4	00:01:00	00:09:00	00:19:00	00:20:00	1Infasurf/calfactant	3.51667	1.58333	00:20:00	00:19:00	00:01:00	1	1	25	21	0		5	0	0
[truncated: 28 more columns]
